# Supplementary material for: A dynamic polyurea network with exceptional creep resistance
Source: Royal Society of Chemistry journal article supplement (doi:10.1039/d2ta05858h), 2022-01-01
Supplement: d2ta05858h2.pdf [file d2ta05858h2.pdf]

## Supporting Information

### **A Dynamic Polyurea Network with Exceptional Creep Resistance**

*Yan Ma, Hong-Qin Wang, Pei-Chen Zhao, Fang-Zhou Wang, Cheng-Hui Li\**

State Key Laboratory of Coordination Chemistry, School of Chemistry and Chemical Engineering, Nanjing National Laboratory of Microstructures, Collaborative Innovation Center of Advanced Microstructures, Nanjing University, Nanjing 210023, P. R. China.

*\*Correspondence to: [chli@nju.edu.cn](mailto:chli@nju.edu.cn)*

## 1. Preparation of A-PU<sub>x</sub>, AB-PU<sub>1.2</sub> and B-PU<sub>1.2</sub>

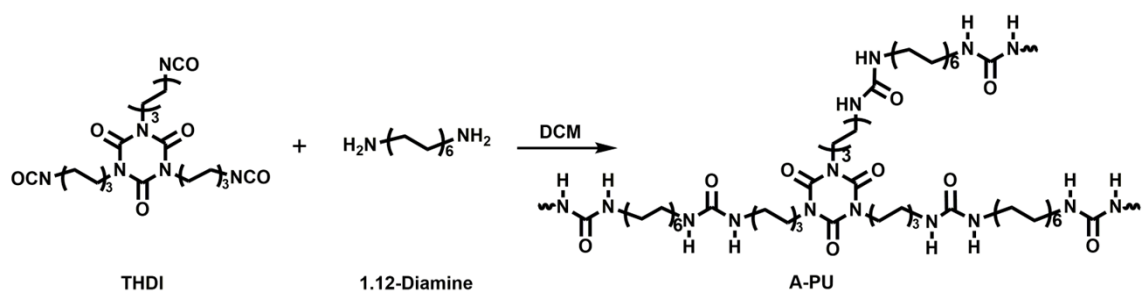

**Scheme S1.** Synthesis route of A-PU<sub>x</sub>.

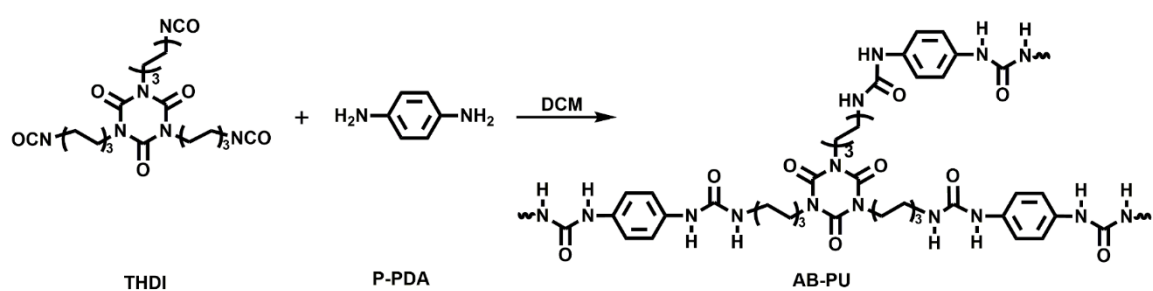

**Scheme S2.** Synthesis route of AB-PU<sub>1.2</sub>.

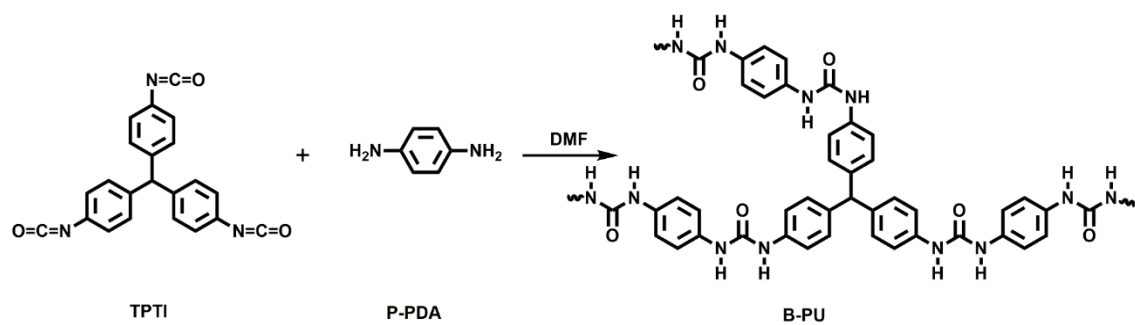

**Scheme S3.** Synthesis route of B-PU<sub>1.2</sub>.

## 2. Results and discussions

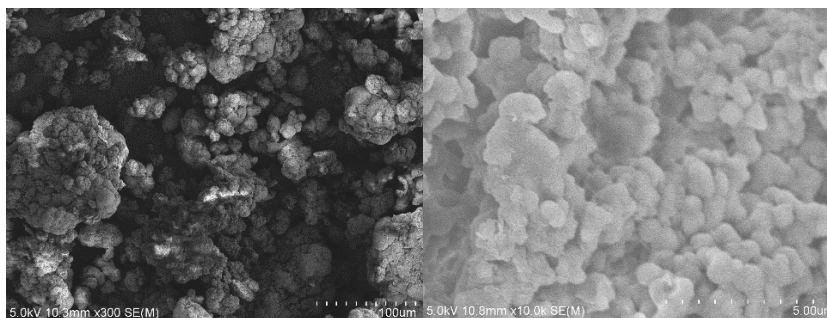

Fig. S1 SEM images of raw products of A-PU<sub>1.2</sub>.

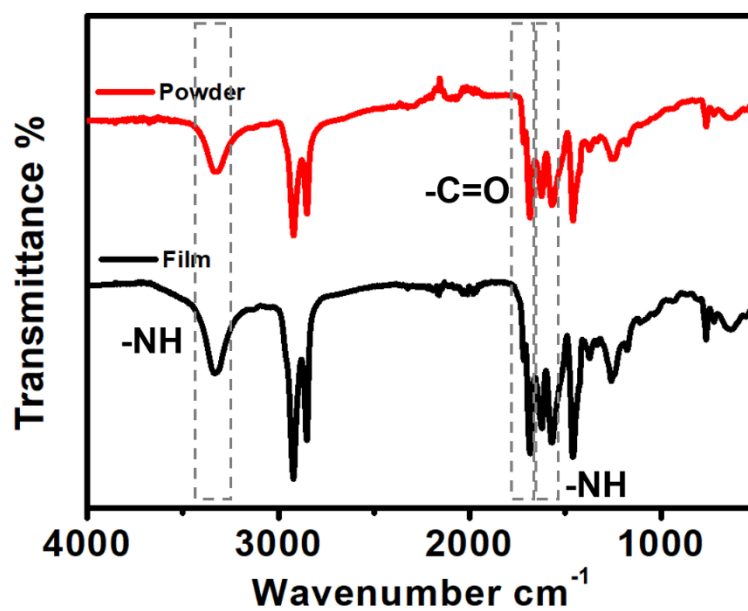

Fig. S2 FT-IR spectra of white powder and film of A-PU<sub>1.2</sub>.

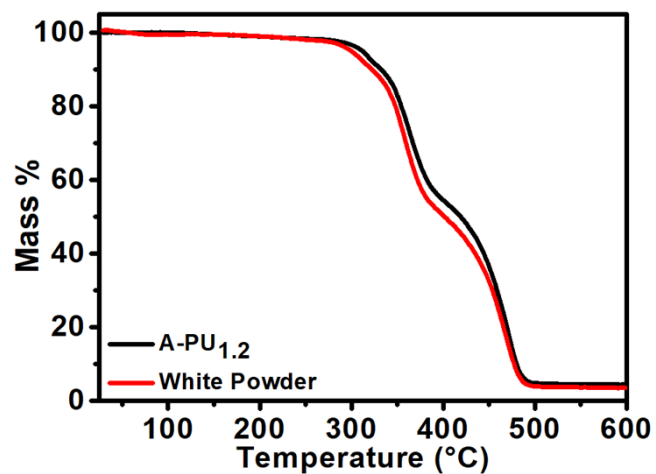

**Fig. S3** TGA curves of A-PU<sub>1.2</sub> film and white powder heated from 30 to 600 °C.

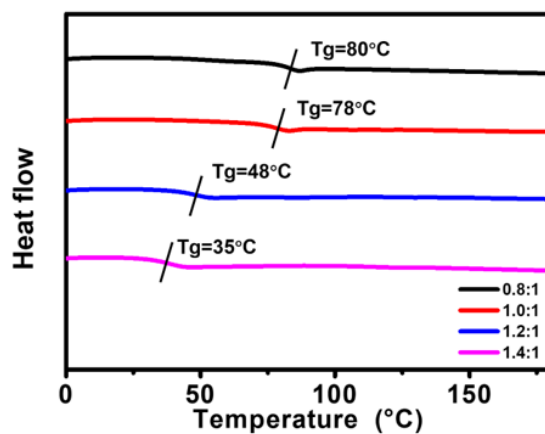

**Fig. S4** DSC curves of four samples with different ratios.

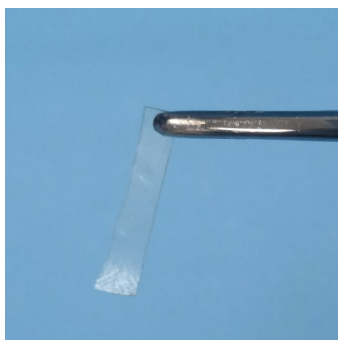

**Fig. S5** The optical image of A-PU<sub>1.2</sub> after tensile test.

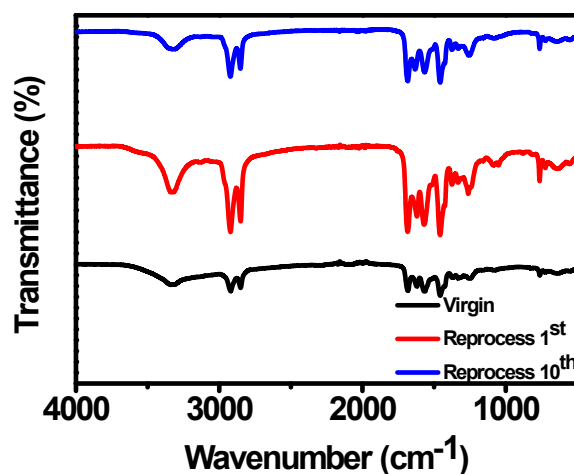

**Fig. S6** FT-IR curves of A-PU<sub>1.2</sub> after multiple cycles of reprocess.

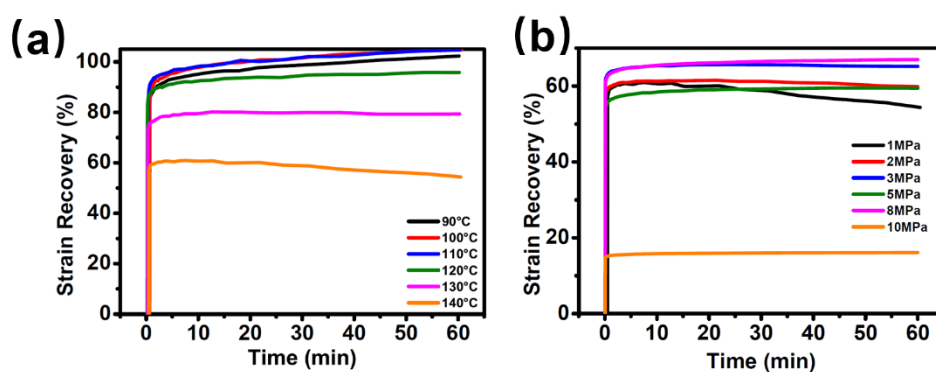

**Fig. S7** Creep recovery curves of A-PU<sub>1.2</sub> (a) at different temperatures after exposure to 1 MPa, (b) at 140 °C under different levels of stresses.

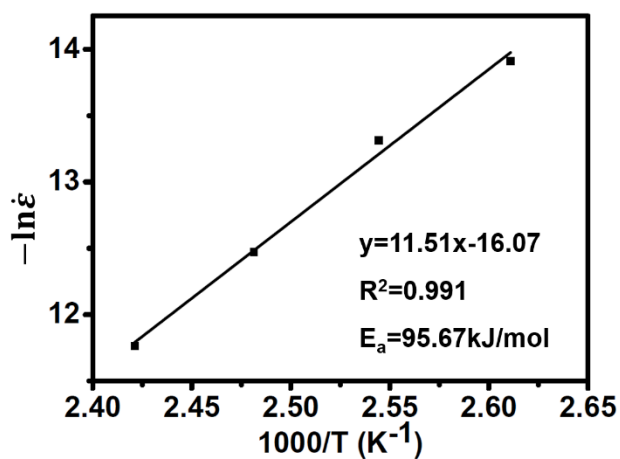

**Fig. S8** Arrhenius fitting plot of the A-PU<sub>1.2</sub> obtained from creep experiments.

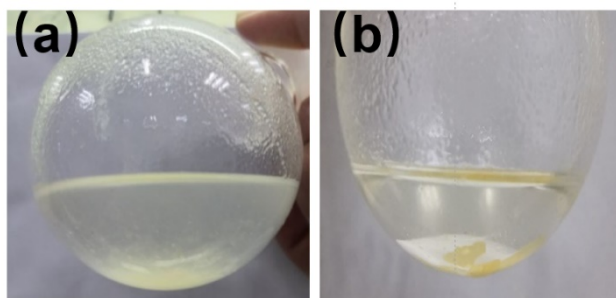

**Fig. S9** The state of (a) A-PU<sub>1.2</sub> white powder and (b) film fragments in NMP at 150 °C.

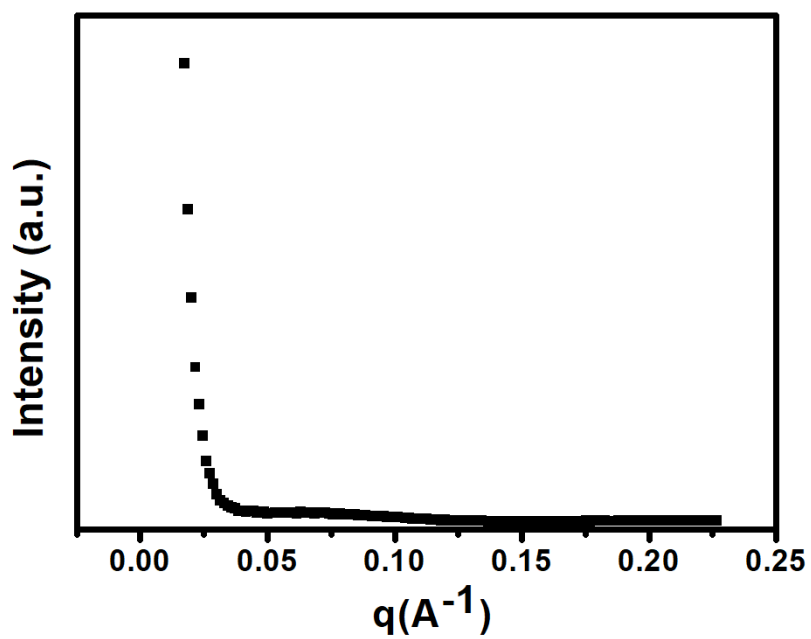

**Fig. S10** The SAXS spectrum of A-PU<sub>1.2</sub>. No peak characteristic was observed in this spectrum, indicating that there is no obvious phase separation in A-PU<sub>1.2</sub>.

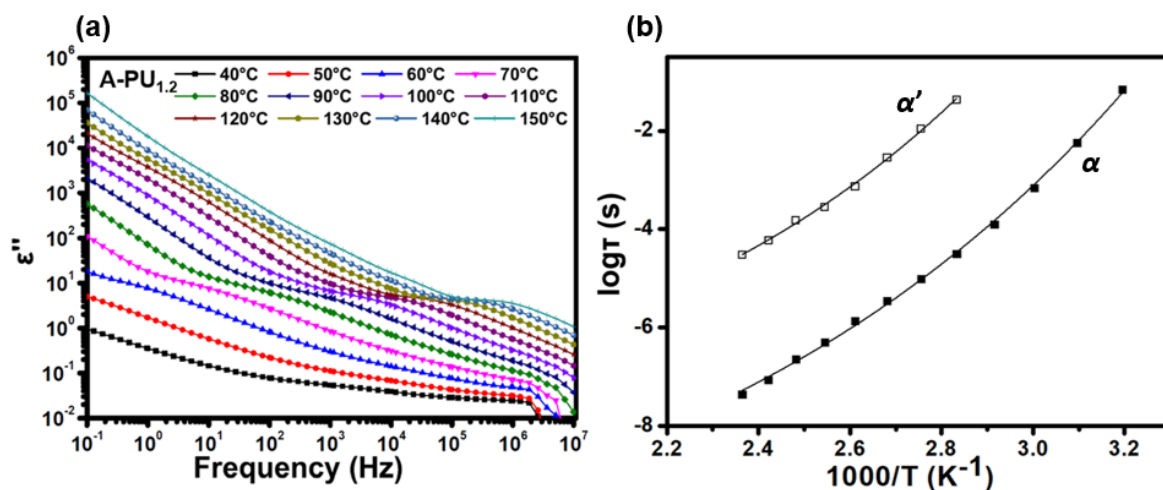

**Fig. S11** Dielectric relaxation behavior of A-PU<sub>1.2</sub> above  $T_g$ . (a) Dielectric loss  $\epsilon''$  as a function of frequency for A-PU<sub>1.2</sub>. (b) Average relaxation time as a function of temperature for  $\alpha$  and  $\alpha'$  relaxation process in A-PU<sub>1.2</sub>. Solid lines represent VFT fitting.

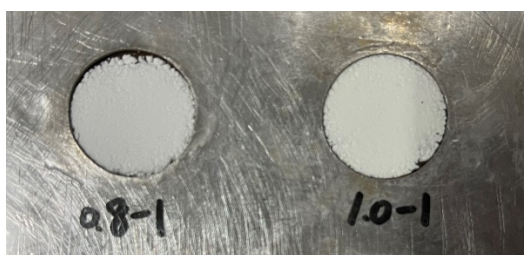

**Fig. S12** The optical images of A-PU<sub>0.8</sub> and A-PU<sub>1.0</sub> after hot pressing of 140 °C and 1 MPa for 30 minutes.

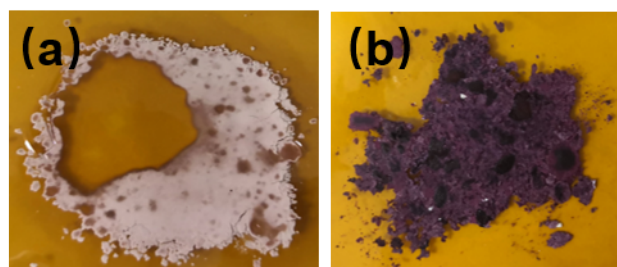

**Fig. S13** The optical images of (a) AB-PU<sub>1.2</sub> and (b) B-PU<sub>1.2</sub> after hot press of 180 °C and 2 MPa for 2 hours.

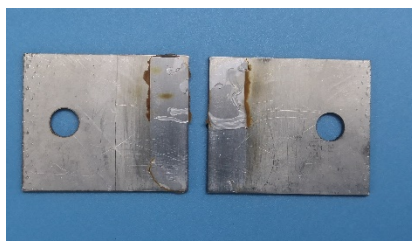

**Fig. S14** The optical image of fracture surface of A-PU<sub>1,2</sub> adhesive.

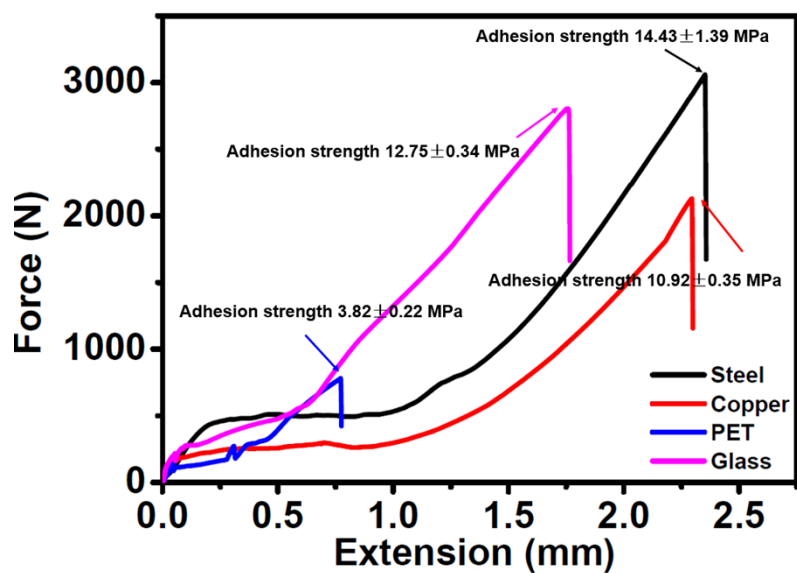

**Fig. S15** The force-versus extension curves for steel, copper, PET and glass sheets adhered by A-PU<sub>1,2</sub> to show adhesion strength.



**Table S1.** Mechanical properties of A-PU<sub>1,2</sub> under different hot press temperature.

| Hot press temperature (°C) | Strength (MPa) | Young's Modulus (MPa) | Elongation (%) | Toughness (MJ/m <sup>3</sup> ) |
|----------------------------|----------------|-----------------------|----------------|--------------------------------|
| 120                        | 13.44          | 349.13                | 5.2            | 0.39                           |
| 130                        | 13.54          | 206.27                | 12.1           | 1.04                           |
| 140                        | 26.66          | 188.27                | 132.2          | 36.33                          |
| 150                        | 31.84          | 231.86                | 144.5          | 48.97                          |
| 160                        | 47.79          | 353.93                | 208.2          | 89.04                          |

**Table S2.** Creep rate  $\dot{\varepsilon}$  of A-PU<sub>1,2</sub> at different temperatures under a stress of 1MPa.

| Temperature (°C) | Creep rate $\dot{\varepsilon}$ (%·s <sup>-1</sup> ) |
|------------------|-----------------------------------------------------|
| 90               | 1.45*10 <sup>-6</sup>                               |
| 100              | 1.25*10 <sup>-6</sup>                               |
| 110              | 9.09*10 <sup>-7</sup>                               |
| 120              | 1.65*10 <sup>-6</sup>                               |
| 130              | 3.83*10 <sup>-6</sup>                               |
| 140              | 7.78*10 <sup>-6</sup>                               |

**Table S3.** The comparison of creep behavior of recyclable CANs reported previously.

| Ref. | Dynamic motifs                                                                       | Temperature (°C) | Stress (MPa) | Strain(%) |
|------|--------------------------------------------------------------------------------------|------------------|--------------|-----------|
| 12   | <p>silyl ether metathesis</p>                                                        | 140              | 0.1          | 80        |
| 24   | S,O-thioacetal                                                                       | 140              | 1            | 3         |
| 25   | $\beta$ -carbonyl carboxylate                                                        | 140              | 6            | 6         |
| 28   | bis(2,2,6,6-tetramethylpiperidin-1-yl) disulfide methacrylate (BiTEMPS methacrylate) | 70               | 0.01         | 8         |

|    |                                                                                                                                                                     |     |       |      |
|----|---------------------------------------------------------------------------------------------------------------------------------------------------------------------|-----|-------|------|
|    | 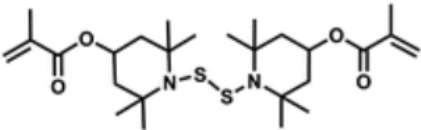 <p><b>BiTEMPS methacrylate</b></p>                                                |     |       |      |
| 29 | Polyimine-metal complex                                                                                                                                             | 140 | 1     | 3.5  |
| 31 | acid-anhydride bond exchange<br> <p><i>Associative acid/anhydride exchange</i></p> | 100 | 0.005 | 3.5  |
| 32 | vinylogous urethane (block vitrimer)<br>                                          | 140 | 0.005 | 0.6  |
| 36 | Dihydrazone<br> <p><b>HBE</b></p>                                                | 150 | 1     | 10   |
| 38 | silyl ether                                                                                                                                                         | 80  | 0.002 | 1.75 |
| 39 | asymmetric acetal<br> <p><b>PRC</b></p>                                          | 120 | 1     | 9    |
| 40 | Azine<br>                                                                        | 140 | 1     | 65   |
| 41 | Hinded urea bonds                                                                                                                                                   | 150 | 0.05  | 17   |

**Table S4.** Swelling ratio of A-PU<sub>1,2</sub> in various solvents for a month.

| Solvent                          | Swelling ratio (%) |
|----------------------------------|--------------------|
| DMF                              | 114.65             |
| THF                              | 118.21             |
| MeCN                             | 103.82             |
| DMSO                             | 106.46             |
| NaOH                             | 104.76             |
| H <sub>2</sub> O                 | 103.54             |
| Tol                              | 115.07             |
| DMAc                             | 122.95             |
| CH <sub>3</sub> OH               | 114.57             |
| EtOH                             | 114.55             |
| HCl                              | 102.21             |
| 1% H <sub>2</sub> O <sub>2</sub> | 102.54             |

**Movie S1.** The joints adhered by A-PU<sub>1,2</sub> can bear a load of 80 kg at room temperature.
